# Supplementary material for: Intestinal inflammation induced by dextran sodium sulphate causes liver inflammation and lipid metabolism disfunction in laying hens
Source: PubMed Central journal article supplement — Poult Sci. 2020 Jan 22;99(3):1663–77. doi: 10.1016/j.psj.2019.11.028 (PMC7587789; doi:10.1016/j.psj.2019.11.028), 2020-01-22
Supplement: mmc1.pdf [file mmc1.pdf]

1 **Supplementary tables**

2

3 **Intestinal inflammation induced by dextran sodium sulphate causes liver inflammation and lipid**  
4 **metabolism dysfunction in laying hens**

5

6 **T Nii <sup>\*,†,1</sup>, T Bungo <sup>\*,†</sup>, N Isobe <sup>\*,†</sup>, Y Yoshimura <sup>\*,†</sup>**

7

8 \* Graduate School of Integrated Science for Life, Hiroshima University, Higashi-Hiroshima, Japan

9 † Research Center for Animal Science, Hiroshima University, Higashi-Hiroshima, Japan

10

11

12 <sup>1</sup> Corresponding author:

13 Takahiro Nii,

14 Graduate School of Integrated Science for Life,

15 Hiroshima University,

16 Higashi-Hiroshima 739-8528, Japan

17 e-mail: [tanii@hiroshima-u.ac.jp](mailto:tanii@hiroshima-u.ac.jp)

18 Tel/Fax: 81-82-424-7958

19

20 **Supplementary Table S1** PCR primers used for mRNA expression analysis.

21

| Target genes                   | Forward Primer             | Revers Primer              | Product size | Accession no.  |
|--------------------------------|----------------------------|----------------------------|--------------|----------------|
| <i>IL-1<math>\beta</math></i>  | GTGAGGCTCAACATTGCGCTGTA    | TGTCCAGGCGGTAGAAGATGAAG    | 214          | NM_204524.1    |
| <i>IL-6</i>                    | AGAAATCCCTCCTCGCCAAT       | AAATAGCGAACGCCCCTCA        | 121          | NM_204628.1    |
| <i>CXCL2</i>                   | CTGTCCTGGCCCTCCTCTGGTT     | TGGCGTCAGCTTCACATCTTG      | 146          | NM_205498.1    |
| <i>IL-10</i>                   | GCTGAGGGTGAAGTTTGAAGAA     | GAAGCGCAGCATCTCTGACA       | 142          | NM_001004414.2 |
| <i>TGF<math>\beta</math>-2</i> | AGGAATGTGCAAGATAATT        | ATTTTGGGTGTTTTGCCAA        | 269          | NM_001031045.3 |
| <i>TGF<math>\beta</math>-3</i> | CAGATCCTGGCGCTCTACA        | GAGGCCTGGATCATGTCA         | 141          | NM_205454.1    |
| <i>TGF<math>\beta</math>-4</i> | ATGAGTATTGGGCCAAAG         | ACGTTGAACACGAAGAAG         | 109          | NM_001318456.1 |
| <i>ACC</i>                     | CTCAGAAATGCCTTTGTC         | CATCTTCCTCGTGTCTCC         | 145          | NM_205505.1    |
| <i>FAS</i>                     | TGAAGGCAATGGGAAACAG        | GACATAACAGGATGAGGTTGATT    | 112          | NM_205155.1    |
| <i>SCD-1</i>                   | ATCTGCACCTCCTTTGGTCG       | GGGATGCCTCACTGCCATTA       | 187          | DQ645535.1     |
| <i>LDLr</i>                    | GGAGCAGTCACAGCATCAGCT      | CTGTGTCACACTCCGCTGTCTC     | 109          | NM_204452.1    |
| <i>SREBP-1</i>                 | CTACCGCTCATCCATCAACG       | CTGCTTCAGCTTCTGGTTGC       | 145          | NM_204126.2    |
| <i>SREBP-2</i>                 | TCCTTGATGATGCAAAGGTTAAGG   | AGGGATGTCAAAGGGTTGAAGG     | 105          | XM_015289037.2 |
| <i>ApoB</i>                    | CTGCAAATGTGGGCTGTTT        | CTGGTTGAGCCATCCAGCTT       | 106          | NM_001044633.1 |
| <i>ApoVLDL-II</i>              | AGGGCTGAACTGGTACCAACAAAC   | GGATGACCAGCCAGTCACGA       | 140          | NM_205483.2    |
| <i>VTG-II</i>                  | CAACATATCTTCCGCTTGTAACATTG | TTCACAACAAAGATTTCTCCAGTAGC | 147          | NM_001031276   |
| <i>ER<math>\alpha</math></i>   | CTTCATCCATCACCACAG         | TAGACATCCTCTCACGAAT        | 143          | NM_205183.1    |
| <i>RPS17</i>                   | AAGCTGCAGGAGGAGGAGAGG      | GGTTGGA CAGGCTGCCGAAGT     | 136          | NM_204217.1    |
| <i>GLUT-2</i>                  | CACACTATGGGCGCATGCT        | ATTGTCCTGGAGGTGTTGGTG      | 68           | NM_207178.1    |
| <i>GLUT-5</i>                  | TTGCTGGCTTTGGGTTGTG        | GGAGGTTGAGGGCCAAAGTC       | 60           | XM_025142667.1 |
| <i>SGLT-1</i>                  | GCCGTGGCCAGGGCTTA          | CAATAACCTGATCTGTGCCACAGTA  | 71           | NM_001293240.1 |

23

24 F, forward; R, reverse, \*PCR products were sequenced for verification.

25

26

**Supplementary Table S2** Effects of paired feeding on the egg production, egg weight and egg shell weight.

|            | group | Day 0 | Day 1           | Day 2           | Day 3           | Day 4                        | Day 5                       |
|------------|-------|-------|-----------------|-----------------|-----------------|------------------------------|-----------------------------|
| Number of  | Con   | 4/4   | 3/4             | 3/4             | 3/4             | 3/4                          | 3/4                         |
| egg laying | DSS   | 4/4   | 4/4             | 4/4             | 4/4             | 4/4                          | 3/4                         |
| Egg weight | Con   | 100.0 | 97.4 $\pm$ 2.4  | 94.3 $\pm$ 1.9  | 101.6 $\pm$ 3.2 | 104.5 $\pm$ 1.6 <sup>a</sup> | 97.6 $\pm$ 1.8 <sup>a</sup> |
| (%)        | DSS   | 100.0 | 100.2 $\pm$ 0.8 | 100.5 $\pm$ 1.4 | 98.1 $\pm$ 1.8  | 96.3 $\pm$ 1.4 <sup>b</sup>  | 90.2 $\pm$ 1.5 <sup>b</sup> |
| Egg-shell  | Con   | 100.0 | 92.4 $\pm$ 6.5  | 81.0 $\pm$ 5.0  | 85.3 $\pm$ 8.7  | 105.0 $\pm$ 4.6 <sup>a</sup> | 98.4 $\pm$ 5.9 <sup>a</sup> |
| weight (%) | DSS   | 100.0 | 97.7 $\pm$ 3.2  | 88.6 $\pm$ 1.2  | 77.6 $\pm$ 1.5  | 76.2 $\pm$ 1.5 <sup>b</sup>  | 71.4 $\pm$ 0.2 <sup>b</sup> |

Number of egg laying means produced egg number/total hen number. Values are mean  $\pm$  SEM of the ratio of egg weight and egg-shell weight against day 0 (%).

Lower case letters (a, b) indicate significant differences between the control and PF groups (P < 0.05).

## Supplementary Figures

### **Intestinal inflammation induced by dextran sodium sulphate causes liver inflammation and lipid metabolism dysfunction in laying hens**

**T Nii <sup>\*,†,1</sup>, T Bungo <sup>\*,†</sup>, N Isobe <sup>\*,†</sup>, Y Yoshimura <sup>\*,†</sup>**

\* Graduate School of Integrated Science for Life, Hiroshima University, Higashi-Hiroshima, Japan

† Research Center for Animal Science, Hiroshima University, Higashi-Hiroshima, Japan

<sup>1</sup> Corresponding author:

Takahiro Nii,  
Graduate School of Integrated Science for Life,  
Hiroshima University,  
Higashi-Hiroshima 739-8528, Japan  
e-mail: [tanii@hiroshima-u.ac.jp](mailto:tanii@hiroshima-u.ac.jp)  
Tel/Fax: 81-82-424-7958

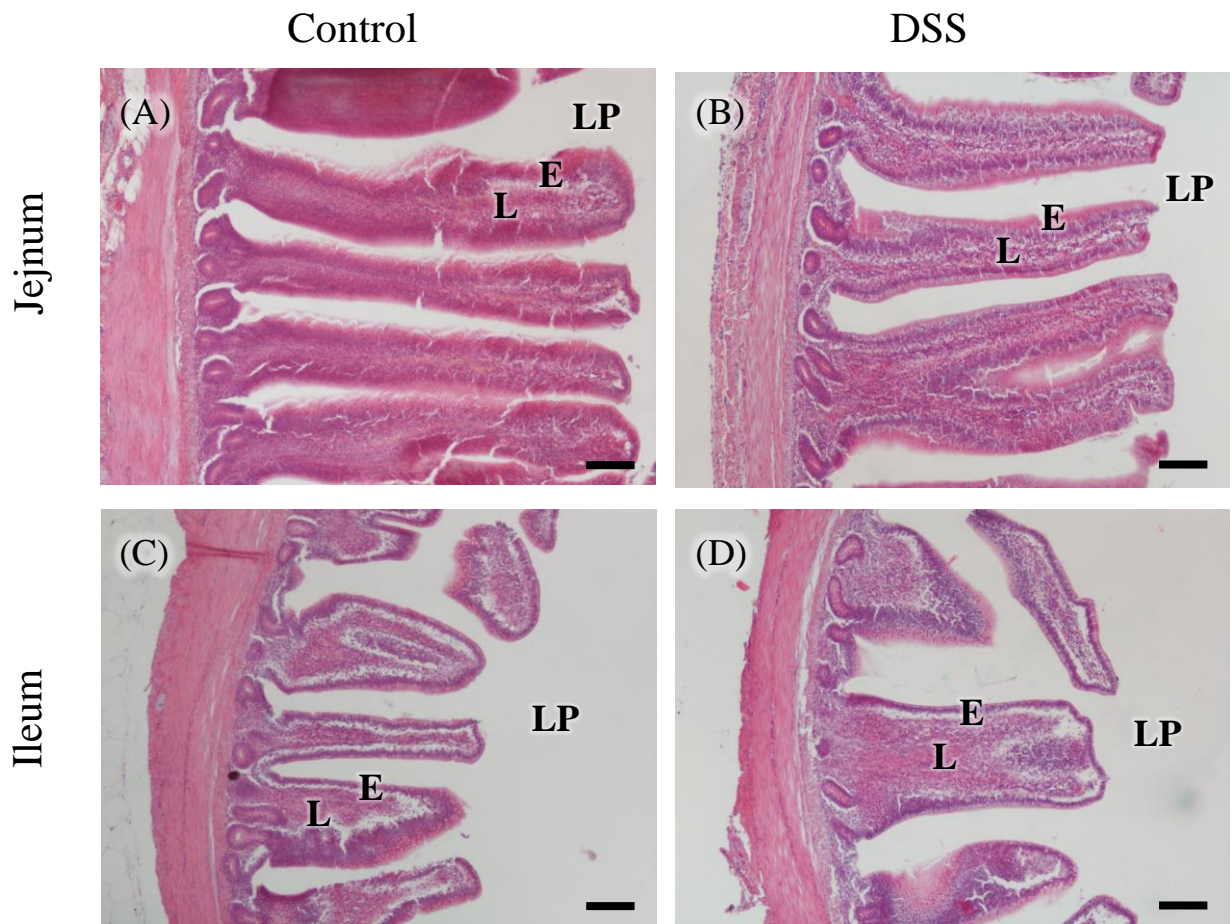

**Supplementary Figure S1** Micrographs showing the histology of the jejunum and ileum of hens oral administered DSS (DSS group) or water (control group). HE-stained tissue from the (A) jejunum of the control group, (B) jejunum of the DSS group, (C) ileum of the control group, and (D) ileum of the DSS group. The lamina propria is covered with simple columnar epithelium. E = mucosal epithelium, L = lumen, LP = lamina propria. Scale bars = 100  $\mu$ m.

(A) *GLUT2*

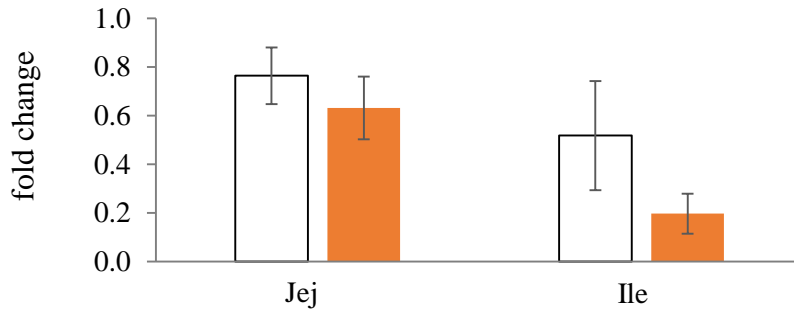

(B) *GLUT5*

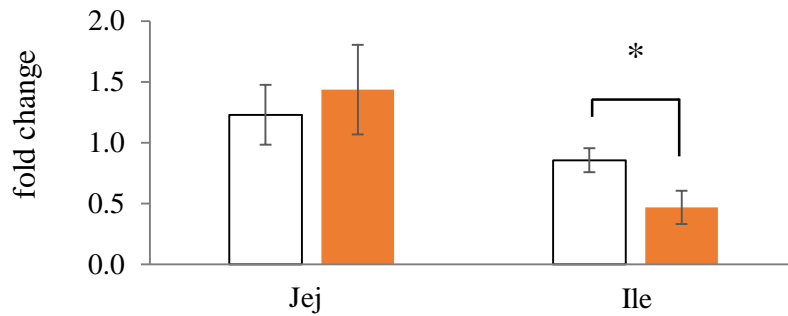

(C) *SGLT1*

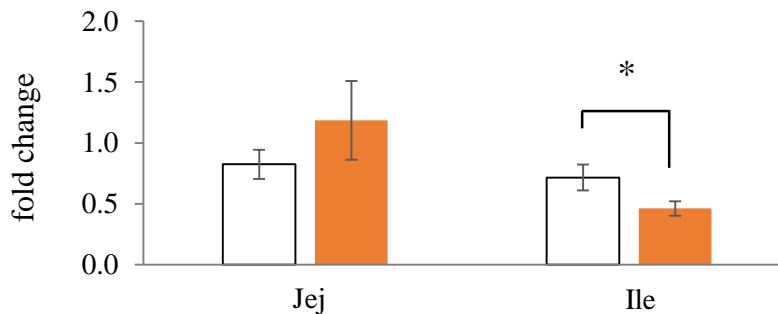

**Supplementary Figure S2** Effects of oral administration of DSS on the mRNA expression of the glucose transporters (A) *GLUT2*, (B) *GLUT5*, and (C) *SGLT1* in the jejunum and ileum. Open bars are the control group, and orange filled bars are the DSS group. Values are mean  $\pm$  SEM (n = 8) of fold change in the target gene expression from a standard sample of each segment in the control group. Target gene expression was normalized to the house-keeping gene RPS17. An asterisk (\*) indicates a significant difference between the control and DSS groups ( $P < 0.05$ ).

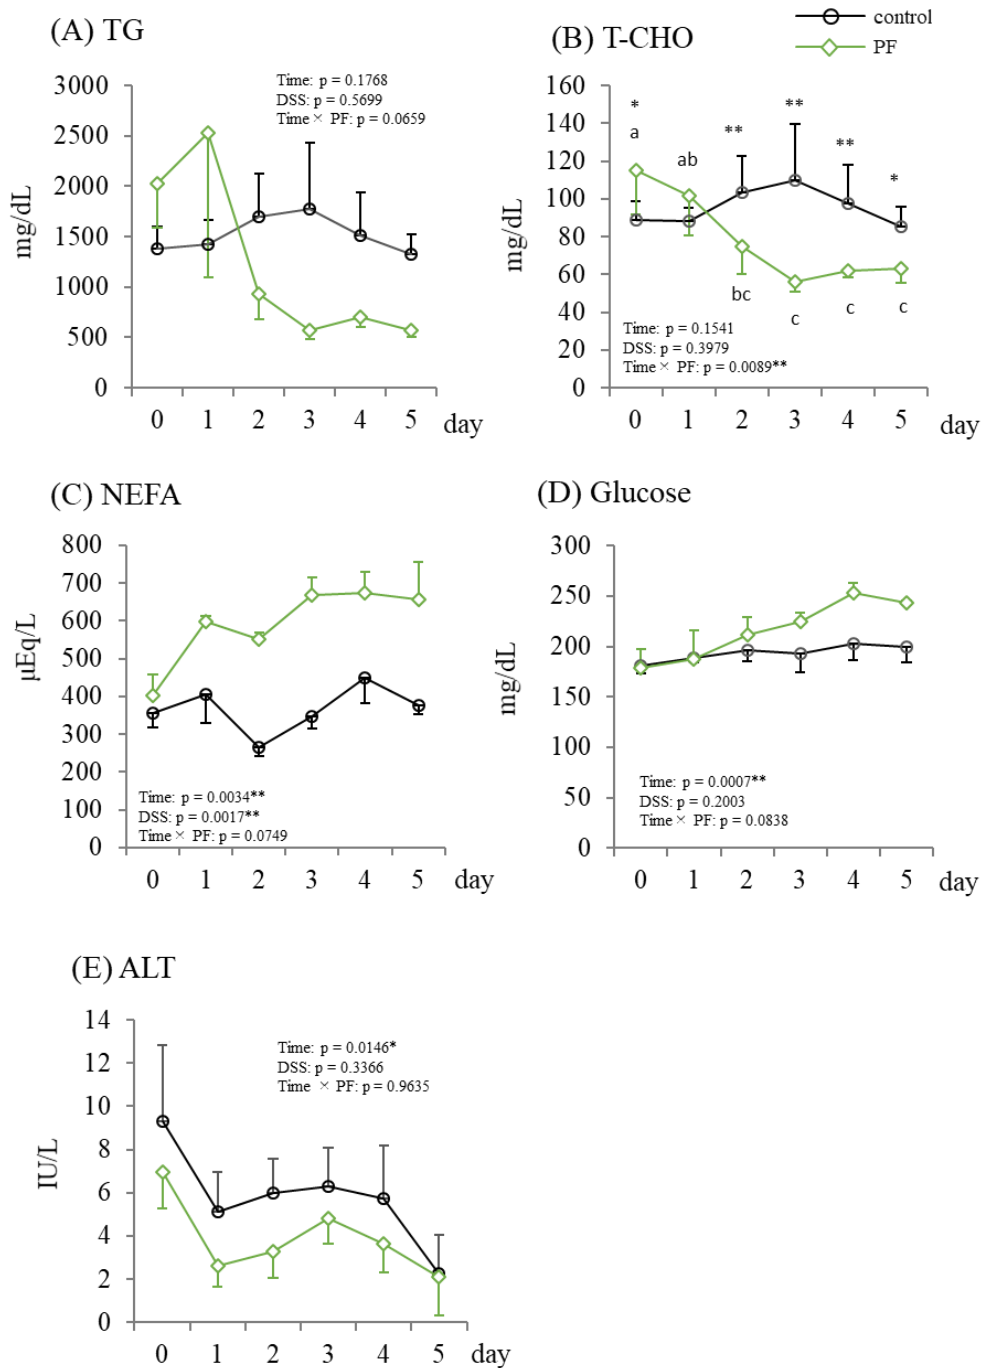

**Supplementary Figure S3** Changes in the blood serum parameters TG (A), T-CHO (B), NEFA (C), glucose (D), and ALT (E) of hens during the paired feeding experiment in the restricted feed (PF) and ad libitum feed (control) groups. Open circle plots are the control group, and green open rhombus plots are the PF group. Values are the mean  $\pm$  SEM ( $n = 4$ ). Significant differences between the control and PF groups at the same time point are indicated with asterisks (\*, \*\* indicate  $P < 0.05$  and  $P < 0.01$ , respectively). Significant differences at different time points are shown as different letters (a–c;  $P < 0.05$ ).

(A) Lipid synthesis-related genes

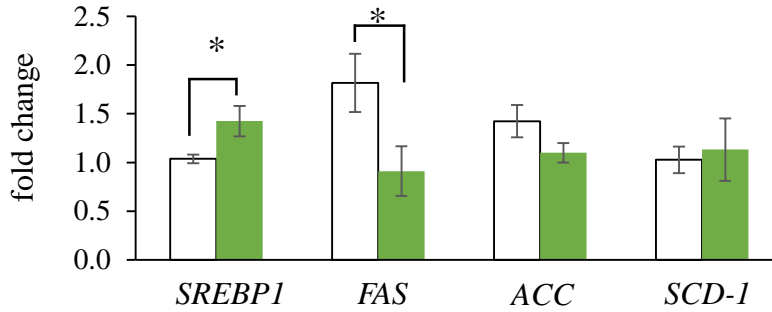

(B) Lipoprotein uptake-related genes

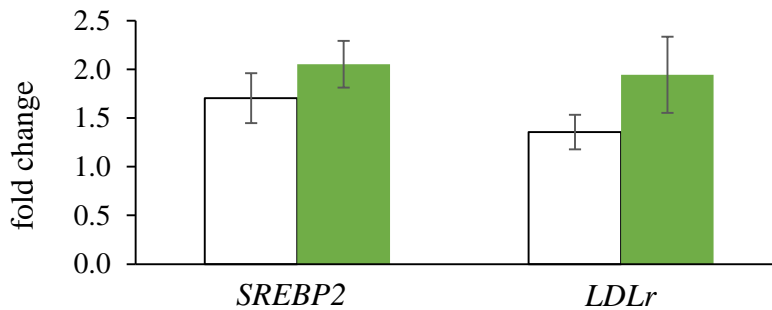

(C) Yolk precursor synthesis-related gene

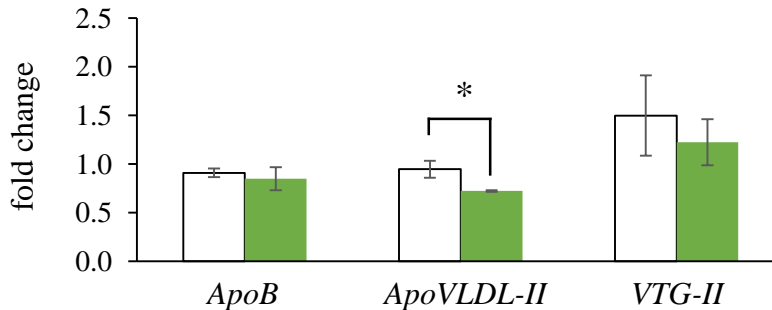

**Supplementary Figure S4** Effects of paired feeding (PF) on the mRNA expression of lipid synthesis-related genes (A; *SREPB-1*, *FAS*, *ACC*, and *SCD-1*), lipoprotein uptake-related genes (B; *SREPB-2* and *LDLr*), and yolk precursor-related genes (C; *ApoB*, *ApoVLDL-II*, and *VTG-II*) in the liver of hens. Open bars are the control group, and green filled bars are the PF group. Values are mean  $\pm$  SEM (n = 8) of fold change in the target gene expression from a standard sample of the control group. Target gene expression was normalized to the house-keeping gene *RPS17*. An asterisk (\*) indicates a significant difference between the *ad libitum* feed (control) and PF groups (P < 0.05).
